# Supplementary material
Source: publisher figshare collection journal article supplement (https://acs.figshare.com/ndownloader/files/14428955)
Supplement: Supplementary file 1 [file 14428955]

## Supporting Information

### **Enhanced performances of PbS quantum dots modified MoS<sub>2</sub> composite for NO<sub>2</sub> detection at room temperature**

*Xin Xin<sup>a</sup>, Yong Zhang<sup>a, b, \*</sup>, Xiaoxiao Guan<sup>a</sup>, Juexian Cao<sup>a, b, \*</sup>, Wenli Li<sup>a</sup>, Xia Long<sup>a</sup>, Xin Tan<sup>a</sup>*

<sup>a</sup> School of Physics and Optoelectronics, Xiangtan University, Xiangtan 411105, PR China

<sup>b</sup> Hunan Institute of Advanced Sensing and Information Technology, Xiangtan University,  
Xiangtan 411105, PR China

\*Corresponding author:

E-mail address: [zhangyong@xtu.edu.cn](mailto:zhangyong@xtu.edu.cn) (Y. Zhang)

[jxcao@xtu.edu.cn](mailto:jxcao@xtu.edu.cn) (J. Cao)

Tel.: +86 731 58292197; Fax: +86 731 58292468

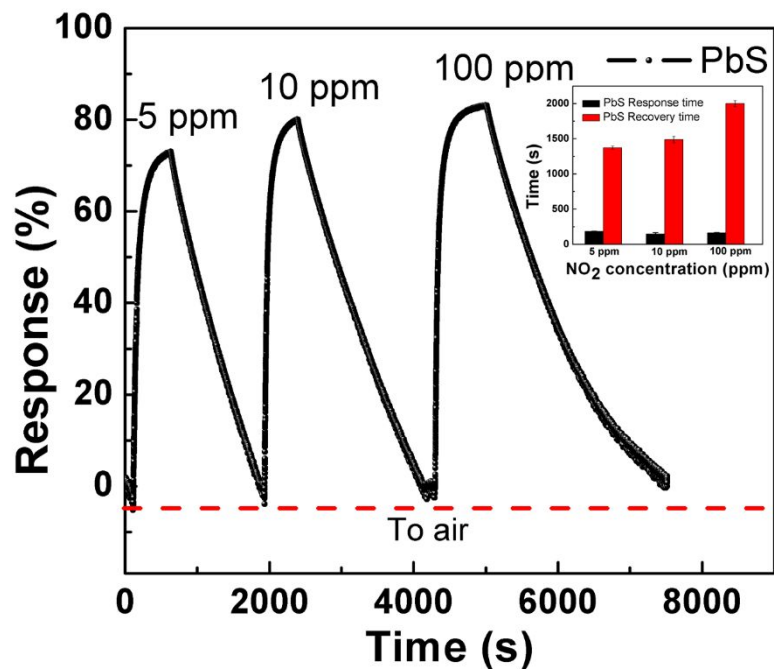

**Figure S1.** Dynamic response-recovery curves of pure PbS gas sensor at different NO<sub>2</sub> concentrations. The inset shows the response and recovery times of pure PbS gas sensor at different NO<sub>2</sub> concentrations.

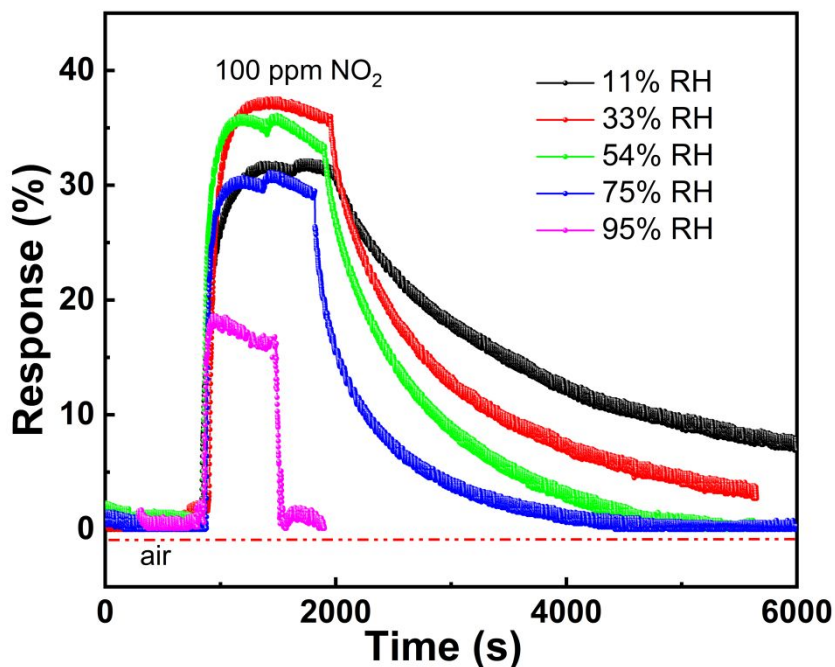

**Figure S2.** Response-recovery curves of MoS<sub>2</sub>/PbS gas sensor at 100 ppm NO<sub>2</sub> under different humidity conditions.

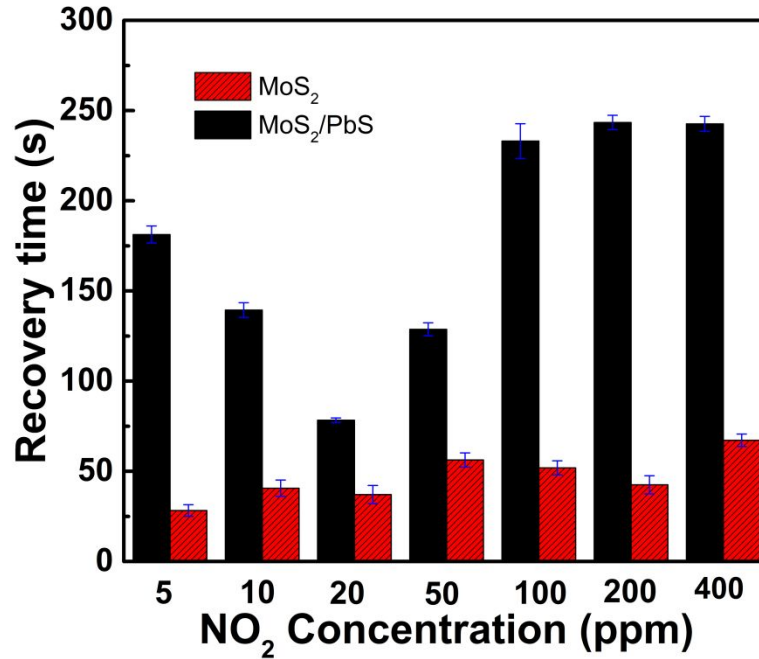

**Figure S3.** Recovery times of MoS<sub>2</sub> and MoS<sub>2</sub>/PbS gas sensors at different NO<sub>2</sub> concentrations.

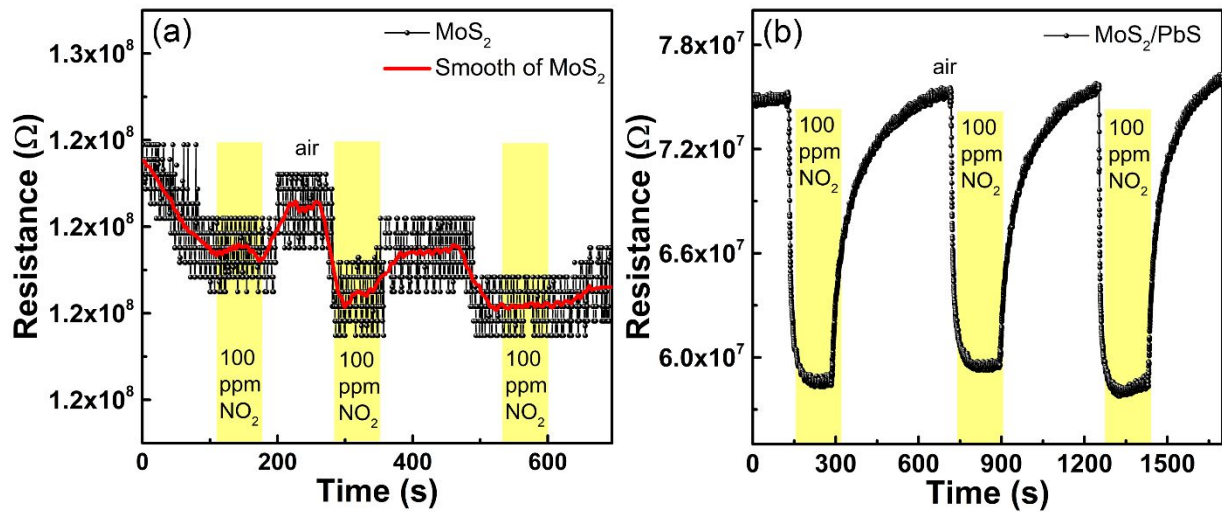

**Figure S4.** Dynamic response and recovery curves of (a) MoS<sub>2</sub> and (b) MoS<sub>2</sub>/PbS gas sensors between air and 100 ppm NO<sub>2</sub> for three cycles.

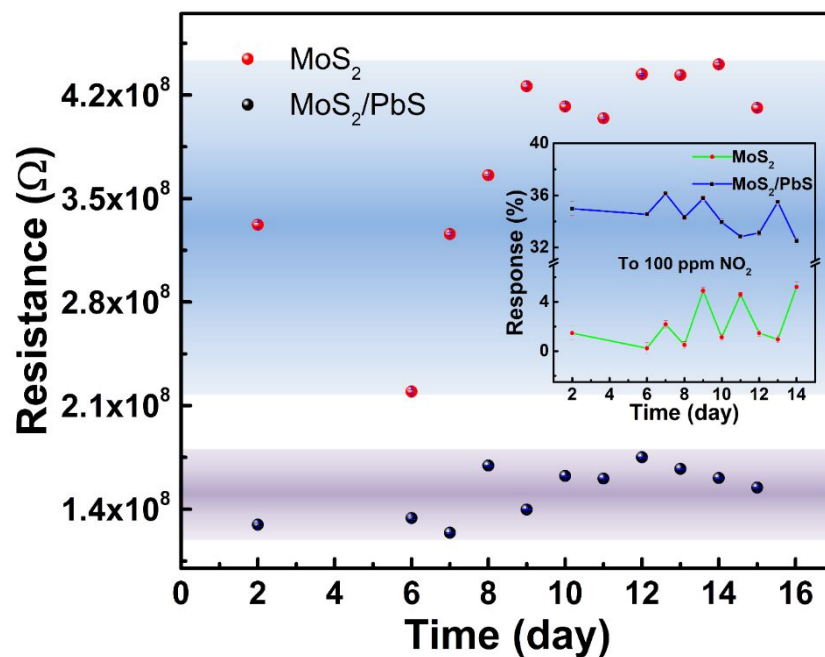

**Figure S5.** Long-term stabilities of MoS<sub>2</sub> and MoS<sub>2</sub>/PbS gas sensors after exposing to the air. The inset shows the responses of MoS<sub>2</sub> and MoS<sub>2</sub>/PbS gas sensors to NO<sub>2</sub> for 15 days.

**Table S1.** The recovery ratios of MoS<sub>2</sub> and MoS<sub>2</sub>/PbS gas sensors at different NO<sub>2</sub> concentrations.

|                                  | 5 ppm | 10 ppm | 20 ppm | 50 ppm | 100 ppm | 200 ppm |
|----------------------------------|-------|--------|--------|--------|---------|---------|
| MoS <sub>2</sub> gas sensor      | 100%  | 98%    | 94%    | 70%    | 50%     | 34%     |
| MoS <sub>2</sub> /PbS gas sensor | 100%  | 100%   | 100%   | 100%   | 100%    | 99%     |
